# Supplementary material
Source: PubMed Central journal article supplement (PMC2861366)
Supplement: NIHMS194327-supplement-1_si_001.pdf [file NIHMS194327-supplement-1_si_001.pdf]

## Supporting Information.

Given that the binding reaction is linked to protonation events the experimental values of  $\Delta H_{\text{obs}}$  determined in any particular buffer will include contributions from the heat of ionization of the buffer as shown in eq. 1.

$$\Delta H_{\text{obs}} = \Delta H_{\text{corr}} + \Delta n_{\text{H}^+} \Delta H_{\text{ion}} \quad (1)$$

where  $\Delta H_{\text{ion}}$  is the buffer ionization enthalpy and  $\Delta n_{\text{H}^+}$  is the number of protons released (positive value) or absorbed (negative value) by the buffer as a result of binding or release, respectively, of protons upon complex formation (1,2). Using eq 1 it is possible, in a model-independent manner, to estimate the value of the binding enthalpy corrected for buffer ionization ( $\Delta H_{\text{corr}}$ ) and  $\Delta n_{\text{H}^+}$  at a particular pH by performing experiments in at least two buffers which differ in their ionization enthalpies. For the PriA interaction with the SSB-Ct peptides in 0.02M NaCl, values of  $\Delta H_{\text{obs,Tris}} = -6.9$  kcal/mol and  $\Delta H_{\text{obs,Cacodylate}} = -17.6$  kcal/mol were obtained in Tris and Cacodylate buffers, respectively (see Table 1 and 2). Since the corresponding ionization enthalpies for each buffer are known ( $\Delta H_{\text{ion,Tris}} = 11.34$  kcal/mol, (3) and  $\Delta H_{\text{ion, Cacodylate}} = -0.47$  kcal/mol (4)) we estimate  $\Delta n_{\text{H}^+} = +0.91$  and  $\Delta H_{\text{corr}} = -17.2$  kcal/mol (2).

## References

1. Eftink, M., and Biltonen, R (1980). Biological microcalorimetry, in *Thermodynamics of Interacting Biological Systems* (Breezer, A. E., Ed.) pp 343-412, Academic Press, New York.
2. Kozlov, A. G., and Lohman, T. M. (1998) Calorimetric studies of E-coli SSB protein single-stranded DNA interactions. Effects of monovalent salts on binding enthalpy, *Journal of Molecular Biology* 278, 999-1014.
3. Christensen, J. J., Hansen, L. D., and Izatt, R. M. (1976) *Handbook of proton ionization heats*, John Wiley & Sons, New York.
4. Fukada, H., and Takahashi, K. (1998) Enthalpy and heat capacity changes for the proton dissociation of various buffer components in 0.1 M potassium chloride, *Proteins* 33, 159-166.
